# Supplementary material for: Ten-year impacts of China’s rural health scheme: lessons for universal health coverage
Source: PubMed Central journal article supplement — BMJ Glob Health. 2021 Apr 22;6(4):e003714. doi: 10.1136/bmjgh-2020-003714 (PMC8070863; doi:10.1136/bmjgh-2020-003714), 2021-04-22
Supplement: bmjgh-2020-003714supp001.pdf [file bmjgh-2020-003714supp001.pdf]

**Supplementary Table 1. Key variable definition**

| Variable                                                   | Variable type                                                                                                                                                                                                                       |
|------------------------------------------------------------|-------------------------------------------------------------------------------------------------------------------------------------------------------------------------------------------------------------------------------------|
| <b>Household level variables</b>                           |                                                                                                                                                                                                                                     |
| If any member in household over 60 years old               | Binary <ul style="list-style-type: none"> <li>• No member above 60 years</li> <li>• At least 1 member above 60 years</li> </ul>                                                                                                     |
| If any member in household below 5 years old               | Binary <ul style="list-style-type: none"> <li>• No member below 5 years</li> <li>• At least 1 member below 5 years</li> </ul>                                                                                                       |
| If any member in household has a chronic disease           | Binary <ul style="list-style-type: none"> <li>• No household member has a chronic disease</li> <li>• At least 1 household member has a chronic disease</li> </ul>                                                                   |
| If any member in household used inpatient service recently | Binary <ul style="list-style-type: none"> <li>• No member in household used inpatient service recently</li> <li>• At least 1 household member has a chronic disease</li> </ul>                                                      |
| Total Household income                                     | Continuous                                                                                                                                                                                                                          |
| Income quintile of per capita household income             | Categorical <ul style="list-style-type: none"> <li>• 1<sup>st</sup> quintile</li> <li>• 2<sup>nd</sup> quintile</li> <li>• 3<sup>rd</sup> quintile</li> <li>• 4<sup>th</sup> quintile</li> <li>• 5<sup>th</sup> quintile</li> </ul> |
| Total Household medical expenditure                        | Continuous                                                                                                                                                                                                                          |
| Household catastrophic expenditure                         | Binary <ul style="list-style-type: none"> <li>• Yes (household medical expenditure greater than 40% of household income)</li> <li>• No (household medical expenditure less than 40% of household income)</li> </ul>                 |
| <b>Individual level variables</b>                          |                                                                                                                                                                                                                                     |
| Have outpatient visit in the past two weeks                | Binary <ul style="list-style-type: none"> <li>• Yes</li> <li>• No</li> </ul>                                                                                                                                                        |
| Admission rate within the past year                        | Binary <ul style="list-style-type: none"> <li>• Yes</li> <li>• No</li> </ul>                                                                                                                                                        |
| Admissions in lower level health facilities                | Binary <ul style="list-style-type: none"> <li>• Yes</li> <li>• No</li> </ul>                                                                                                                                                        |

|                                                              |                                                                              |
|--------------------------------------------------------------|------------------------------------------------------------------------------|
| Did not get admitted when considered necessary by physicians | Binary <ul style="list-style-type: none"> <li>• Yes</li> <li>• No</li> </ul> |
| Forgone necessary admissions due to financial difficulties   | Binary <ul style="list-style-type: none"> <li>• Yes</li> <li>• No</li> </ul> |
| Early discharge due to financial difficulties                | Binary <ul style="list-style-type: none"> <li>• Yes</li> <li>• No</li> </ul> |

**Supplementary Table 2.** Factors associated with households having out-of-pocket medical expenditure exceeding 40% of household income

|                                                                     | Alternative Model1<br>Odds Ratio (95% CI) | Alternative Model2<br>Odds Ratio (95% CI) |
|---------------------------------------------------------------------|-------------------------------------------|-------------------------------------------|
| Survey year (2003 as base level)                                    |                                           |                                           |
| 2008                                                                | 1.07 (0.73 1.57)                          | 0.84 (0.61 1.16)                          |
| 2013                                                                | 1.37 (0.91 2.06)                          | 0.87 (0.63 1.21)                          |
| Area (west is base level)                                           |                                           |                                           |
| East                                                                | 1.12 (0.77 1.63)                          | 1.22 (0.85 1.75)                          |
| Central                                                             | 1.02 (0.78 1.34)                          | 1.08 (0.81 1.44)                          |
| Income group (1 <sup>th</sup> quintile is base level)               |                                           |                                           |
| 2st quintile                                                        |                                           | 0.35 (0.30 0.40)                          |
| 3rd quintile                                                        |                                           | 0.22 (0.19 0.25)                          |
| 4nd quintile                                                        |                                           | 0.17 (0.15 0.20)                          |
| 5th quintile                                                        |                                           | 0.09 (0.07 0.11)                          |
| Household size (1-2person as base level)                            |                                           |                                           |
| 3-4 persons                                                         |                                           | 0.49 (0.45 0.53)                          |
| Over 5 persons                                                      |                                           | 0.27 (0.23 0.33)                          |
| If any member in household is below 5 years old (No is base level)  |                                           |                                           |
| Yes                                                                 |                                           | 1.06 (0.96 1.19)                          |
| If any member in household is over 60 years old (No is base level)  |                                           |                                           |
| Yes                                                                 |                                           | 1.17 (1.07 1.28)                          |
| If any member in household has a chronic disease (No is base level) |                                           |                                           |
| Yes                                                                 |                                           | 3.44 (3.09 3.84)                          |
